# Supplementary material
Source: HighWire-hosted journal article supplement (http://www.canjsurg.ca/highwire/filestream/98538/field_highwire_adjunct_files/0/CJS-001722-at-1.pdf)
Supplement: CJS-001722-at-1.pdf [file CJS-001722-at-1.pdf]

**Appendix 1** to Mardinger C, Drover A, Hyndman E, et al. A novel computerized approach to scoping reviews using Synthesis software: the first 15 years of The American College of Surgeons National Surgical Quality Improvement Program. *Can J Surg* 2023. Copyright © 2023 The Author(s) or their employer(s).

To receive this resource in an accessible format, please contact us at [cmajgroup@cmaj.ca](mailto:cmajgroup@cmaj.ca).

DOI: 10.1503/cjs001722

*Online appendices are unedited and posted as supplied by the authors.*

Supplemental Content Table 1. Category Definition Examples for Surgical Specialty

| Main Category                            | Category Definitions Examples                                               |
|------------------------------------------|-----------------------------------------------------------------------------|
| Cardiac Surgery                          | Cardiac Surgery, valve replacement, pacemaker, coronary artery bypass...    |
| General Surgery                          | General Surgery, bariatric, mastectomy, colorectal...                       |
| Otolaryngology and Head and Neck Surgery | Otolaryngology, rhinology, tracheostomy, glossectomy...                     |
| Orthopedic Surgery                       | Orthopedic, fusion, meniscectomy, joint replacement...                      |
| Plastic Surgery                          | Plastic, aesthetic, craniofacial, breast reconstruction, tissue transfer... |
| Pediatric Surgery                        | Pediatric, adolescent, children, neonatal...                                |
| Vascular Surgery                         | Vascular, abdominal aortic aneurysm, infrainguinal bypass, endovascular...  |
| Thoracic Surgery                         | Thoracic, diaphragmatic, thoracoscopy, pleurectomy...                       |
| Podiatry                                 | Podiatry                                                                    |
| Dentistry                                | Dentistry                                                                   |
| Oro-Maxillofacial Surgery                | Maxillofacial                                                               |
| Transplant Surgery                       | Transplant                                                                  |
| Urology                                  | Urology, cystectomy, nephrectomy, prostatectomy...                          |
| Surgical Oncology                        | Cancer, metastatic, chemotherapy, neoplasm...                               |
| Obstetrics and Gynecology                | Gynecology, oophorectomy, colpopexy, hysterectomy...                        |
| Neurosurgery                             | Neurosurgery, craniotomy, ventricular shunt, temporal lobectomy...          |
| Anesthesia                               | Anesthesia, analgesia                                                       |
| Unknown                                  | No categories identified                                                    |

**Appendix 1** to Mardinger C, Drover A, Hyndman E, et al. A novel computerized approach to scoping reviews using Synthesis software: the first 15 years of The American College of Surgeons National Surgical Quality Improvement Program. *Can J Surg* 2023. Copyright © 2023 The Author(s) or their employer(s).

To receive this resource in an accessible format, please contact us at [cmajgroup@cmaj.ca](mailto:cmajgroup@cmaj.ca).

DOI: 10.1503/cjs001722

*Online appendices are unedited and posted as supplied by the authors.*

2

Supplemental Content Table 2. Category Definition Examples for Study Type

| <b>Main Category</b> | <b>Category Definition Examples</b>                                                     |
|----------------------|-----------------------------------------------------------------------------------------|
| Association          | Association, Relationship, Differences, Comparison, Correlation, Disparities, Effect... |
| Characteristics      | Characteristics, Determinants, Burden, Classification, Descriptive...                   |
| Estimates            | Estimates, Prevalence, Incidence, Occurrence...                                         |
| Surveillance         | Surveillance, Trends, Pattern, Update, Screening...                                     |
| Risk                 | Risk, Frailty Index, Score...                                                           |
| Utilization          | Utilization, Usage, Access, Services, Treatment...                                      |
| Implementation       | Implementation, Application, Planning, Management...                                    |
| Prediction           | Prediction                                                                              |
| Methodology          | Methodology, Algorithm, Derive, Design, Develop...                                      |
| Evaluation           | Evaluation, Validation, Accuracy, Reliability, Impact...                                |
| Education            | Education, Training, Curriculum, Learning...                                            |
| Economics            | Compensation, Reimbursement, Payment, Billing, Cost...                                  |
| Outcomes             | Outcomes, Mortality, Morbidity, Readmission, Length of Stay, Reoperation, Discharge...  |
| Adverse Events       | Adverse, Complications, Infections...                                                   |
| Unknown              | No categories identified                                                                |

**Appendix 1** to Mardinger C, Drover A, Hyndman E, et al. A novel computerized approach to scoping reviews using Synthesis software: the first 15 years of The American College of Surgeons National Surgical Quality Improvement Program. *Can J Surg* 2023. Copyright © 2023 The Author(s) or their employer(s).

To receive this resource in an accessible format, please contact us at [cmajgroup@cmaj.ca](mailto:cmajgroup@cmaj.ca).

DOI: 10.1503/cjs001722

*Online appendices are unedited and posted as supplied by the authors.*

Supplemental Content Table 3. Detailed Category Definitions for Surgical Speciality

| Main Category   | Category Definitions                                                                                                                                                                                                                                                                                                                                                                                                                                                                                                                                                                                                                                                                                                                                                                                                                                                                                                                                                                                                                                                                                                                                                                                                                                                                                                                                                                                                                                                                |
|-----------------|-------------------------------------------------------------------------------------------------------------------------------------------------------------------------------------------------------------------------------------------------------------------------------------------------------------------------------------------------------------------------------------------------------------------------------------------------------------------------------------------------------------------------------------------------------------------------------------------------------------------------------------------------------------------------------------------------------------------------------------------------------------------------------------------------------------------------------------------------------------------------------------------------------------------------------------------------------------------------------------------------------------------------------------------------------------------------------------------------------------------------------------------------------------------------------------------------------------------------------------------------------------------------------------------------------------------------------------------------------------------------------------------------------------------------------------------------------------------------------------|
| Cardiac Surgery | ((title:"cardiac surgery") AND NOT (title:"non-cardiac surgery")) OR journal:cardiology OR journal:cardiothoracic OR ((title:"Cardiac surgery") AND NOT (title:"non-cardiac surgery")) OR title:Pericardiotom* OR title:Cardiotom* OR title:Valvotom* OR title:"valve replacement" OR title:"valve surgery" OR title:"valve surgeries" OR title:"valve repair" OR title:pacemaker OR title:"Coronary artery bypass" OR title:"coronary venous graft"                                                                                                                                                                                                                                                                                                                                                                                                                                                                                                                                                                                                                                                                                                                                                                                                                                                                                                                                                                                                                                |
| General Surgery | title:"General Surgery" OR title:"general surgeries" OR title:"general surgical" OR title:"general surgeon" OR title:"general and vascular surgery" OR title:"general and thoracic" OR journal:"General Surgery" OR title:gastrointestinal OR journal:gastrointestinal OR journal:colon OR journal:rectum OR journal:"general and vascular surgery" OR journal:"general and thoracic" OR title:adrenal OR title:adrenalectom* OR title:Appendix OR title:Appendectom* OR title:appendiceal OR title:Appendicitis OR title:bariatric OR title:"weight loss surgery" OR title:"sleeve gastrectomy" OR title:"Roux-en-Y" OR title:"gastric bypass" OR title:"bowel resection" OR title:colon* OR title:colotom* OR title:enterostom* OR title:enterotom* OR title:colorectal OR title:colectom* OR title:ostom* OR title:proctocolectom* OR title:proctocol-ectomy OR title:ileocolic OR title:ileo-colic OR title:"small bowel" OR title:enterotom* OR title:enterostom* OR title:ileostom* OR title:ileo* OR title:ileal OR title:jejun* OR title:jejunostom* OR title:gastroduodenal OR title:duode* OR title:intestinal OR title:Breast OR title:Mastectom* OR title:mammaplast* OR title:lumpectom* OR title:postmastectomy OR title:colon* OR title:colotom* OR title:enterostom* OR title:enterotom* OR title:colorectal OR title:colectom* OR title:colostomy OR title:ostom* OR title:proctocolectom* OR title:"proctocol-ectomy" OR title:ileocolic OR title:"ileo-colic" OR |

**Appendix 1** to Mardinger C, Drover A, Hyndman E, et al. A novel computerized approach to scoping reviews using Synthesis software: the first 15 years of The American College of Surgeons National Surgical Quality Improvement Program. *Can J Surg* 2023. Copyright © 2023 The Author(s) or their employer(s).

To receive this resource in an accessible format, please contact us at [cmajgroup@cmaj.ca](mailto:cmajgroup@cmaj.ca).

DOI: 10.1503/cjs001722

*Online appendices are unedited and posted as supplied by the authors.*

4

---

((title:diverticulectomy) AND NOT (title:"urethral diverticulectomy" OR title:"Zenker's diverticulectomy")) OR ((title:diverticulum) AND NOT (title:"hypopharyngeal diverticulum")) OR title:gastric OR title:gastrectom\* OR title:"peptic ulcer surgery" OR title:esophagogastrom\* OR title:gastrom\* OR title:vagotomy OR title:gastroduodenal OR title:fundoplication OR title:gastroesophageal OR title:gastrointestinal OR title:"intra-abdominal" OR title:gastroenterological OR title:hernia\* OR title:hernioplast\* OR title:herniorrhaphy OR title:herniotom\* OR title:"Bile duct" OR title:pancrea\* OR title:whipple\* OR title:Gallbladder OR title:Cholecyst\* OR title:hepatic OR title:hepatectom\* OR title:posthepatectom\* OR title:hepato\* OR title:hepaticojejunostom\* OR title:HPB OR title:"liver tumor" OR title:"liver tumors" OR title:"liver cancer" OR title:"liver resection" OR title:"liver resections" OR title:"liver surgery" OR title:"liver metastasis" OR title:"liver metastases" OR title:"liver, pancreatic, and colorectal surgery" OR title:Puestow OR title:cholangiocarcinoma OR ((title:liver) AND NOT (title:"liver function" OR title:"liver disease" OR title:"liver failure")) OR title:lymphadenectomy OR title:"lymph node" OR title:"lymph nodes" OR title:colorectal OR title:rectal OR title:Proctectom\* OR title:proctocolectom\* OR title: "proctocol-ectomy" OR title:ileoanal OR title:anal OR title:anorectal OR title:recto\* OR ((title:"anastomosis") AND NOT (title:"arteriovenous anastomosis")) OR title:"small bowel" OR title:enterotom\* OR title:enterostom\* OR title:ileostom\* OR title:ileo\* OR title:ileal OR title:jejun\* OR title:jejunostom\* OR title:gastroduodenal OR title:duode\* OR title:spleen OR title:"splenic flexure" OR title:splenectom\* OR title:trauma OR journal:trauma OR title:laparotom\* OR title:enterolysis OR title:abdominoperineal OR title:"abdominal surgical operations" OR title:"abdominal surgery" OR title:"abdominal operations" OR title:"thoracoabdominal operation" OR title:abdominopelvic OR title:"pelvic surgery" OR title:colitis OR title:IBD OR title:"inflammatory bowel disease" OR

---

**Appendix 1** to Mardinger C, Drover A, Hyndman E, et al. A novel computerized approach to scoping reviews using Synthesis software: the first 15 years of The American College of Surgeons National Surgical Quality Improvement Program. *Can J Surg* 2023. Copyright © 2023 The Author(s) or their employer(s).

To receive this resource in an accessible format, please contact us at [cmajgroup@cmaj.ca](mailto:cmajgroup@cmaj.ca).

DOI: 10.1503/cjs001722

*Online appendices are unedited and posted as supplied by the authors.*

5

---

|                                          |                                                                                                                                                                                                                                                                                                                                                                                                                                                                                                                                                                                                                                                                                                                                         |
|------------------------------------------|-----------------------------------------------------------------------------------------------------------------------------------------------------------------------------------------------------------------------------------------------------------------------------------------------------------------------------------------------------------------------------------------------------------------------------------------------------------------------------------------------------------------------------------------------------------------------------------------------------------------------------------------------------------------------------------------------------------------------------------------|
|                                          | title:"inflammatory bowel diseases" OR title:crohn* OR title:diverticulitis OR title:"diverticular disease" OR title:hirschsprung* OR title:"abdominal wall reconstruction" OR title:hartmann* OR title:pringle OR title:"sigmoid volvulus" OR title:"heller myotomy" OR title:"peptic ulcer disease" OR title:"peptic ulcers" OR title:omentoplasty OR title:RYGB OR title:foregut OR title:"metabolic/diabetes surgery" OR title:"endocrine surgery" OR title:pyloromyotomy OR title:"gallstone ileus" OR title:perianal OR title:biliary OR title:"anastomotic leak" OR title:cholangiography OR title:"enterocutaneous fistulas" OR title:"bowel obstruction" OR title:stoma OR title:"component separation" OR title:gastroschisis |
| Otolaryngology and Head and Neck Surgery | title:Otolaryngolog* OR journal:Otolaryngolog* OR journal:laryngoscope OR journal:otology OR journal:rhinology OR journal:laryngology OR journal:ORL OR title:Laryng* OR title:"head and neck" OR title:pharyng* OR title:"branchial cleft cyst" OR title:esophag* OR title:esophagogastrom* OR title:esophagectom* OR title:Glossectom* OR title:tongue OR title:"oral cavity" OR title:"choanal atresia" OR title:hypopharyngeal OR title:"neck dissection" OR title:thyroid* OR title:thyroid OR title:"thyroglossal duct cyst" OR title:tracheostomy OR title:hyperparathyroid* OR title:parathyroid* OR title:goiter OR title:hemithyroidectomy                                                                                    |
| Orthopedic Surgery                       | title:orthop* OR journal:orthop* OR journal:spine OR title:amputation* OR title:arthro* OR title:THA OR title:TKA OR title:extremity OR title:extremities OR title:extensor OR title:forearm OR title:limb OR title:elbow OR title:wrist OR title:ankle OR title:fusion OR title:fusions OR title:refusion OR title:arthrodesis OR title:"distal radius fracture" OR title:"distal radius fractures" OR title:"fracture of the hip" OR title:"hip fracture" OR title:"hip fractures" OR title:"ankle fracture" OR title:"ankle fractures" OR title:"humerus fracture" OR title:"humerus fractures" OR title:"compression fracture" OR title:"compression fractures" OR title:"femoral neck fracture" OR title:"femoral neck             |

---

**Appendix 1** to Mardinger C, Drover A, Hyndman E, et al. A novel computerized approach to scoping reviews using Synthesis software: the first 15 years of The American College of Surgeons National Surgical Quality Improvement Program. *Can J Surg* 2023. Copyright © 2023 The Author(s) or their employer(s).

To receive this resource in an accessible format, please contact us at [cmajgroup@cmaj.ca](mailto:cmajgroup@cmaj.ca).

DOI: 10.1503/cjs001722

*Online appendices are unedited and posted as supplied by the authors.*

6

Plastic Surgery

---

fractures" OR title: "odontoid fracture" OR title:"odontoid fractures" OR title: "femoral shaft fracture" OR title:"femur fractures" OR title:"trimalleolar fractures" OR title:"bimalleolar fractures" OR title:"pilon fractures" OR title:"Hip/pelvis fractures" OR title:"intertrochanteric fractures" OR title:"C2 fractures" OR title:"knee fractures" OR title:"proximal ulna fractures" OR title:"malleolar fractures" OR title:"humeral fractures" OR title:"tibia fractures" OR title:"tibial plateau fractures" OR title:"tibial shaft fractures" OR title:"humeral shaft fractures" OR title:"pelvic/acetabular fractures" OR title:"clavicular fractures" OR title:clavicle OR journal:"shoulder and elbow surgery" OR title:hip OR title:Hemiarthroplast\* OR title:THA OR title:"pelvic osteotomy" OR title:knee OR title:meniscectomy OR title:ACL OR title:PCL OR title:"anterior cruciate ligament reconstruction" OR title:"posterior cruciate ligament reconstruction" OR title:patellofemoral OR title:TKA OR title:lumbar OR title:spine OR ((title:spinal) AND NOT (title:"spinal anesthesia" OR title:"spinal and general anesthesia" OR title:"spinal versus general anesthesia")) OR title:kyphoplast\* OR title:vertebroplast\* OR title:discectom\* OR title:laminectom\* OR title:ACDF OR title:vertebral OR title:disc OR title:microdiscectomy OR title:"degenerative cervical myelopathy" OR title:"open reduction" OR title:ORIF OR title:"Iatarjet-bristow" OR title:shoulder OR title:"bankart" OR title:"rotator cuff" OR title:spinopelvic OR title:"joint replacement" OR title:achilles OR title:"femoral neck" OR title:"above-knee" OR title:"through-knee" OR title:scoliosis OR title:plastic OR title:oncoplastic OR journal:plastic OR journal:aesthetic OR title:craniofacial OR journal:craniofacial OR title:"breast reconstruction" OR title:"chest reconstruction" OR title:gynecomastia OR title:uvulopalatopharyngoplasty OR ((title:cleft) AND NOT (title:"branchial cleft cyst")) OR title:contour\* OR title:flap\* OR title:"tissue transfer" OR title:"free tissue" OR title:"free-

---

**Appendix 1** to Mardinger C, Drover A, Hyndman E, et al. A novel computerized approach to scoping reviews using Synthesis software: the first 15 years of The American College of Surgeons National Surgical Quality Improvement Program. *Can J Surg* 2023. Copyright © 2023 The Author(s) or their employer(s).

To receive this resource in an accessible format, please contact us at [cmajgroup@cmaj.ca](mailto:cmajgroup@cmaj.ca).

DOI: 10.1503/cjs001722

*Online appendices are unedited and posted as supplied by the authors.*

7

---

|                   |                                                                                                                                                                                                                                                                                                                                                                                                                                                                                                                                                                                                                                                                                                                                                                                                                                                                                                                                                                                                                                                                                                                                                                                    |
|-------------------|------------------------------------------------------------------------------------------------------------------------------------------------------------------------------------------------------------------------------------------------------------------------------------------------------------------------------------------------------------------------------------------------------------------------------------------------------------------------------------------------------------------------------------------------------------------------------------------------------------------------------------------------------------------------------------------------------------------------------------------------------------------------------------------------------------------------------------------------------------------------------------------------------------------------------------------------------------------------------------------------------------------------------------------------------------------------------------------------------------------------------------------------------------------------------------|
|                   | tissue" OR title:"free flap" OR title:microsurg* OR title:microvascular OR title:autologous OR title:panniculectomy OR title:craniosynostosis OR title:"surgical repair of pressure ulcers" OR title:"surgically managed pressure ulcers" title:syndactyly OR title:polydactyly OR ((title:hand*) AND NOT (title:"hand-assisted")) OR title:"ligament reconstruction and tendon interposition" OR title:"hidradenitis suppurativa" OR title:otoplasty OR title:"mandibular fracture" OR title:"mandibular fractures" OR title:"facial fracture" OR title:"hand fractures"                                                                                                                                                                                                                                                                                                                                                                                                                                                                                                                                                                                                          |
| Pediatric Surgery | title:pediatric* OR title:paediatric OR journal:pediatric* OR title:adolescen* OR title:children* OR journal:children OR title:neonatal OR journal:neonatal OR journal:perinatology OR title:infant*                                                                                                                                                                                                                                                                                                                                                                                                                                                                                                                                                                                                                                                                                                                                                                                                                                                                                                                                                                               |
| Vascular Surgery  | title:vascular OR title:endovascular OR title:revascularization OR journal:vascular OR journal:endovascular OR journal:revascularization OR title:EVAR OR title:"abdominal aortic aneurysm" OR title:"abdominal aortic aneurysms" OR title:"aortic abdominal aneurysm" OR title:"aortic abdominal aneurysms" OR title:"aortic abdominal aneurysm" OR title:"thoracoabdominal aortic aneurysm" OR title:"thoracoabdominal aortic aneurysms" OR title:"thoracoabdominal aneurysm" OR title:"thoracoabdominal aneurysms" OR title:"aortic aneurysm" OR title:"aortic aneurysms" OR title:"aortoiliac aneurysm" OR title:"aortoiliac aneurysms" OR title:"aortoiliac aneurysm" OR title:"aortic repair" OR title:"abdominal aortic dissection repair" OR title:"aortic surgery" OR title:Arteriovenostom* OR title:"arteriovenous fistula" OR title:"arteriovenous anastomosis" OR title:Carotid OR title:Endarterectom* OR title:endarterectomies OR title:Thromboendarterectom* OR title:"femoropopliteal bypass" OR title:"femoral-popliteal bypass" OR title:"bypass leg surgery" OR title:"infrainguinal bypass" OR title:"infrainguinal arterial bypass" OR title:revascular* OR |

---

**Appendix 1** to Mardinger C, Drover A, Hyndman E, et al. A novel computerized approach to scoping reviews using Synthesis software: the first 15 years of The American College of Surgeons National Surgical Quality Improvement Program. *Can J Surg* 2023. Copyright © 2023 The Author(s) or their employer(s).

To receive this resource in an accessible format, please contact us at [cmajgroup@cmaj.ca](mailto:cmajgroup@cmaj.ca).

DOI: 10.1503/cjs001722

*Online appendices are unedited and posted as supplied by the authors.*

8

---

|                           |                                                                                                                                                                                                                                                                                                                                                                                                                                                                                                                                                                                                                                                                                                                                                                                                                                                                                                                                                            |
|---------------------------|------------------------------------------------------------------------------------------------------------------------------------------------------------------------------------------------------------------------------------------------------------------------------------------------------------------------------------------------------------------------------------------------------------------------------------------------------------------------------------------------------------------------------------------------------------------------------------------------------------------------------------------------------------------------------------------------------------------------------------------------------------------------------------------------------------------------------------------------------------------------------------------------------------------------------------------------------------|
| Thoracic Surgery          | title:"peritoneal dialysis catheter placement" OR title:"upper extremity bypass"<br>title:thoracic OR journal:cardiothoracic OR journal:thoracic OR title:diaphragmatic OR title:diaphragm OR title:thoracic OR title:thoracotom* OR title:pleurectom* OR title:lung OR title:"pulmonary resection" OR ((title:lobectomy) AND NOT (title:"temporal lobectomy")) OR title:pneumonectom* OR title:thymectomy OR title:transhiatal OR title:diversion OR (title:divert AND NOT title:diverticul*) OR title:"congenital pulmonary airway malformations" OR title:"congenital lung malformations" OR title:"congenital pulmonary lesions" OR title:thoroscopic OR title:thoracoscopy OR title:VATS                                                                                                                                                                                                                                                              |
| Oro-Maxillofacial Surgery | title:maxillofacial OR journal:maxillofacial                                                                                                                                                                                                                                                                                                                                                                                                                                                                                                                                                                                                                                                                                                                                                                                                                                                                                                               |
| Transplant Surgery        | title:transplant* OR journal:transplant*                                                                                                                                                                                                                                                                                                                                                                                                                                                                                                                                                                                                                                                                                                                                                                                                                                                                                                                   |
| Urology                   | title:urolog* OR journal:urolog* OR journal:endourology OR title:cystectom* OR title:bladder OR title:Nephrostom* OR title:Pyelotom* OR title:nephrectom* OR title:nephroureterectom* OR title:pyeloplast* OR ((title:renal) AND NOT (title:"renal disease" OR title:"renal function" OR title:"renal failure" OR title:"renal dysfunction")) OR ((title:kidney) AND NOT (title:"kidney disease" OR title:"kidney function" OR title:"kidney failure" OR title:"kidney injury" OR title:"kidney transplantation")) OR title:penile OR title:penectomy OR title:prostate OR title:Prostatectom* OR title:"benign prostatic hyperplasia procedures" OR title:"benign prostatic hyperplasia surgery" OR title:"benign prostatic enlargement surgery" OR title:testicular OR title:orchiectomy OR title:"urethral diverticulectomy" OR title:cystourethroscopy OR title:vesicovaginal OR title:hypospadias OR title:"TURBT" OR "title:transurethral resection" |
| Surgical Oncology         | title:onco* OR journal:onco* OR title:cancer* OR journal:cancer* OR title:onc* OR title:tumor* OR title:tumour* OR title:metastatic OR title:metastas* OR title:chemoradiation OR title:chemotherapy OR title:radiotherapy OR title:radiation OR title:malignancy OR                                                                                                                                                                                                                                                                                                                                                                                                                                                                                                                                                                                                                                                                                       |

---

**Appendix 1** to Mardinger C, Drover A, Hyndman E, et al. A novel computerized approach to scoping reviews using Synthesis software: the first 15 years of The American College of Surgeons National Surgical Quality Improvement Program. *Can J Surg* 2023. Copyright © 2023 The Author(s) or their employer(s).

To receive this resource in an accessible format, please contact us at [cmajgroup@cmaj.ca](mailto:cmajgroup@cmaj.ca).

DOI: 10.1503/cjs001722

*Online appendices are unedited and posted as supplied by the authors.*

---

|                           |                                                                                                                                                                                                                                                                                                                                                                                                                                                                                                                                                                                                                                                                                                                                                                                                                                                                                                                  |
|---------------------------|------------------------------------------------------------------------------------------------------------------------------------------------------------------------------------------------------------------------------------------------------------------------------------------------------------------------------------------------------------------------------------------------------------------------------------------------------------------------------------------------------------------------------------------------------------------------------------------------------------------------------------------------------------------------------------------------------------------------------------------------------------------------------------------------------------------------------------------------------------------------------------------------------------------|
| Obstetrics and Gynecology | <p>title:neoplasm OR title:melanoma OR title:carcinoma OR<br/> title:sarcoma OR title:HIPEC OR title:cytoreductive<br/> title:gynecology OR title:gynaecological OR title:gynecologic<br/> OR journal:gynecology OR journal:gynecologic OR<br/> title:urogynecology OR title:urogynecologic OR<br/> journal:urogynecology OR title:endometrial OR title:ovarian<br/> OR title:oophorectomy OR title:hysterotomy OR<br/> title:hysterectomy OR title:uterine OR title:"cervical cancer"<br/> OR title:"cervical malignancy" OR title:myomectomy OR<br/> title:vaginal OR title:"apical prolapse surgery" OR<br/> title:"uterovaginal prolapse" OR title:"pelvic organ prolapse"<br/> OR title:"uterovaginal prolapse" OR title:sacrocolpopexy OR<br/> title:"pelvic floor" OR title:colpopexy OR title:debulk* OR<br/> (title:sling AND NOT title:"male sling") OR title:"pelvic<br/> reconstructive surgery"</p> |
| Neurosurgery              | <p>title:neurosurgery OR title:neurosurgical OR<br/> journal:neurosurg* OR title:Craniotomy OR title:craniotomies<br/> OR title:"cranial surgery" OR title:"temporal lobectomy" OR<br/> title:Craniectom* OR title:intracranial OR (title:cranial AND<br/> NOT (title:"cranial nerve")) OR title:"brain tumour resection"<br/> OR title:"deep brain stimulation" OR title:"brain tumor<br/> surgery" OR title:"cerebrovascular surgery" OR title:pituitary<br/> OR title:"skull base" OR title:"cranial surgery" OR<br/> title:cranioplasty OR title:"surgery for cerebellar hemorrhage"<br/> OR title:"ventricular shunt" OR title:schwannoma OR<br/> title:"transsphenoidal surgery" OR title:electrocorticography<br/> OR title:"epilepsy surgery" OR title:"pineal surgery" OR<br/> title:"vertebral fracture" OR title:"vertebral fractures"</p>                                                            |
| Anesthesia                | <p>title:anesthe* OR title:anaesthe* OR journal:anesthe* OR<br/> journal:anaesthe* OR title:analgesia</p>                                                                                                                                                                                                                                                                                                                                                                                                                                                                                                                                                                                                                                                                                                                                                                                                        |
| Unknown                   | No definition                                                                                                                                                                                                                                                                                                                                                                                                                                                                                                                                                                                                                                                                                                                                                                                                                                                                                                    |
| Podiatry                  | None identified                                                                                                                                                                                                                                                                                                                                                                                                                                                                                                                                                                                                                                                                                                                                                                                                                                                                                                  |
| Dentistry                 | None identified                                                                                                                                                                                                                                                                                                                                                                                                                                                                                                                                                                                                                                                                                                                                                                                                                                                                                                  |

---

**Appendix 1** to Mardinger C, Drover A, Hyndman E, et al. A novel computerized approach to scoping reviews using Synthesis software: the first 15 years of The American College of Surgeons National Surgical Quality Improvement Program. *Can J Surg* 2023. Copyright © 2023 The Author(s) or their employer(s).

To receive this resource in an accessible format, please contact us at [cmajgroup@cmaj.ca](mailto:cmajgroup@cmaj.ca).

DOI: 10.1503/cjs001722

*Online appendices are unedited and posted as supplied by the authors.*

10

Supplemental Content Table 4. Detailed Category Definitions for Study Type

| <b>Main Category</b> | <b>Category Definitions</b>                                                                                                                                                                                                                                                                                                                                                                                                                                                                                                                          |
|----------------------|------------------------------------------------------------------------------------------------------------------------------------------------------------------------------------------------------------------------------------------------------------------------------------------------------------------------------------------------------------------------------------------------------------------------------------------------------------------------------------------------------------------------------------------------------|
| Association          | title:associat* OR (title:associations AND title:between) OR title:relation* OR title:differences OR title:compar* OR title:variation* OR title:correlat* OR title:dispar* OR title:after OR title:effect OR title:following                                                                                                                                                                                                                                                                                                                         |
| Characteristics      | title:characterist* OR title:epidemiology OR title:determinants OR title:consump* OR title:burden OR title:profile OR title:classif* OR title:descriptive OR title:determinant* OR title:frail* OR title:"advanced age" OR title:geriatric* OR title:septuagenarian* OR title:octogenarian* OR title:elderly OR title:older OR title:"oldest old" OR title:nonagenarian* OR title:"65 years" OR title:"nursing home" OR title:obesity OR title:obese OR title:superobese OR title:overweight OR title:"body mass index" OR title:BMI OR title:weight |
| Estimates            | title:prevalence OR title:incidence OR title:estimates OR title:occurrence* OR title:adjust*                                                                                                                                                                                                                                                                                                                                                                                                                                                         |
| Surveillance         | title:surveillance OR title:trends OR title:increas* OR title:decreas* OR title:chang* OR title:pattern* OR title:updat* OR title:screening OR title:rate                                                                                                                                                                                                                                                                                                                                                                                            |
| Risk                 | title:risk* OR title:"risk-scoring" OR title:"risk index" OR title:"risk model" OR title:"risk assessment tool" OR title:"risk assessment model" OR title:"risk stratification" OR title:"risk score" OR title:"risk-scoring" OR title:"risk factor" OR title:"risk factors" OR title:"risk-stratified" OR title:"risk calculator" OR title:"frailty index" OR title:scoring OR title:score* OR title:"surgical apgar score"                                                                                                                         |
| Utilization          | title:utilization OR title:usage OR title:access OR title:services OR title:treatment                                                                                                                                                                                                                                                                                                                                                                                                                                                                |
| Implementation       | title:implement* OR title:application OR title:planning OR title:manag* OR title:recommend*                                                                                                                                                                                                                                                                                                                                                                                                                                                          |
| Prediction           | title:predict*                                                                                                                                                                                                                                                                                                                                                                                                                                                                                                                                       |
| Methodology          | title:method* OR title:algorithm* OR title:deriv* OR title:design* OR title:develop*                                                                                                                                                                                                                                                                                                                                                                                                                                                                 |
| Evaluation           | title:evaluat* OR title:valid* OR title:accur* OR title:reliab* OR title:impact* OR title:adherence                                                                                                                                                                                                                                                                                                                                                                                                                                                  |

**Appendix 1** to Mardinger C, Drover A, Hyndman E, et al. A novel computerized approach to scoping reviews using Synthesis software: the first 15 years of The American College of Surgeons National Surgical Quality Improvement Program. *Can J Surg* 2023. Copyright © 2023 The Author(s) or their employer(s).

To receive this resource in an accessible format, please contact us at [cmajgroup@cmaj.ca](mailto:cmajgroup@cmaj.ca).

DOI: 10.1503/cjs001722

*Online appendices are unedited and posted as supplied by the authors.*

11

|                |                                                                                                                                                                                                                                                                                                                                                                                                                                                      |
|----------------|------------------------------------------------------------------------------------------------------------------------------------------------------------------------------------------------------------------------------------------------------------------------------------------------------------------------------------------------------------------------------------------------------------------------------------------------------|
| Education      | title:training OR title:teach* OR title:resident* OR title:student* OR title:fellow* OR title:intern OR title:trainee* OR title:educat* OR title:"attending surgeons" OR title:learning OR title:curriculum OR title:academic OR title:certification OR title:QITI                                                                                                                                                                                   |
| Economics      | title:compensate* OR title:reimburs* OR title:fee OR title:pay* OR title:financ* OR title:economic OR title:bill* OR title:cost* OR title:expenditur*                                                                                                                                                                                                                                                                                                |
| Outcomes       | title:outcomes OR title:mortality OR title:death* OR title:moribund OR title:morbidity OR title:readm* OR title:stay OR title:reop* OR title:revision OR title:"return to the operating room" OR title:"repeated operation" OR title:discharge OR title:post-discharge OR title:predischarge OR title:postdischarge OR title:"transfer" OR title:"non-home discharge" OR title:"postacute care" OR title:"post-acute care" OR title:"rehabilitation" |
| Adverse Events | title:adverse OR title:complication* OR title:infection* OR title:transfus* OR title:"venous thromboembolism" OR title:"venous thrombosis" OR title:"venous thromboses" OR title:"venous thrombi" OR title:"deep vein thrombosis" OR title:"deep vein thromboses" OR title:thrombosis OR title:thromboses OR title:DVT OR title:VTE OR title:thromboembolic                                                                                          |
| Unknown        | No definition                                                                                                                                                                                                                                                                                                                                                                                                                                        |

---
